# Supplementary material
Source: publisher figshare collection journal article supplement (https://acs.figshare.com/ndownloader/files/12268055)
Supplement: Supplementary file 1 [file 12268055]

## Supporting Information

### One-pot Facile Synthesis of Graphene Quantum Dots from Rice Husks for Fe<sup>3+</sup> Sensing

Weilin Wang,<sup>1,2</sup> Zhaofeng Wang,<sup>2,3</sup> Jingjing Liu,<sup>2,4</sup> Yikang Peng,<sup>2,4</sup> Xiaoyuan Yu,<sup>2,5</sup>  
Weixing Wang,<sup>1</sup> Zhengguo Zhang,<sup>1,\*</sup> Luyi Sun<sup>2,4,6,\*</sup>

<sup>1</sup>Ministry of Education Key Laboratory of Enhanced Heat Transfer & Energy Conservation, School of Chemistry and Chemical Engineering, South China University of Technology, Guangzhou, Guangdong 510640, China

<sup>2</sup>Polymer Program, Institute of Materials Science, University of Connecticut, Storrs, CT 06269, United States

<sup>3</sup>State Key Laboratory of Solid Lubrication, Lanzhou Institute of Chemical Physics, Chinese Academy of Sciences, Lanzhou, Gansu 730000, China

<sup>4</sup>Department of Chemical and Biomolecular Engineering, University of Connecticut, Storrs, CT 06269, United States

<sup>5</sup>Institute of Biomaterials, College of Materials and Energy, South China Agricultural University, Guangzhou, Guangdong 510642, China

<sup>6</sup>Department of Biomedical Engineering, University of Connecticut, Storrs, CT 06269, United States

\*Authors to whom correspondence should be addressed:

Dr. Luyi Sun, Tel: (860) 486-6895; Fax: (860) 486-4745; Email: [luyi.sun@uconn.edu](mailto:luyi.sun@uconn.edu)

Dr. Zhengguo Zhang, Tel: 086-87112845; Email: [cezhang@scut.edu.cn](mailto:cezhang@scut.edu.cn)

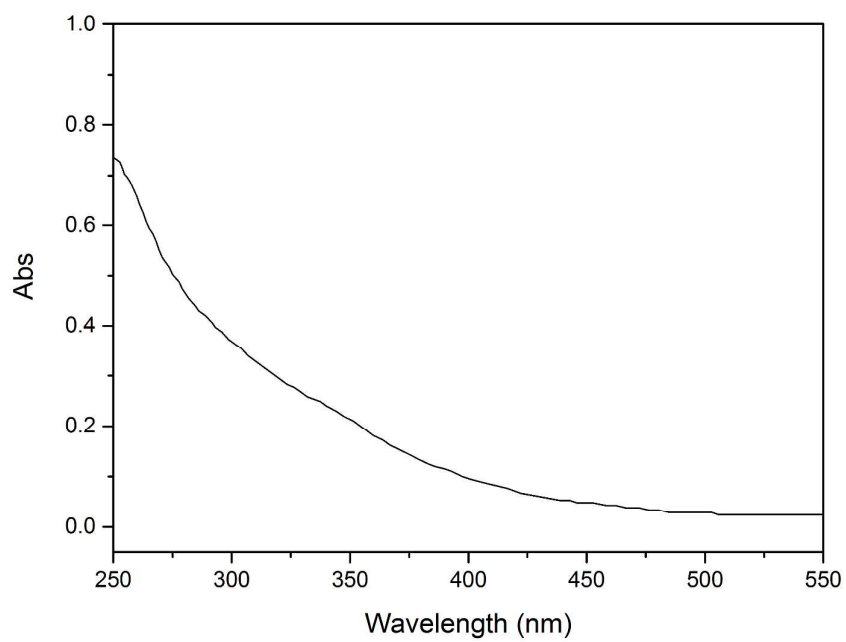

Figure S1. UV-Vis spectrum of the RH-GQDs.

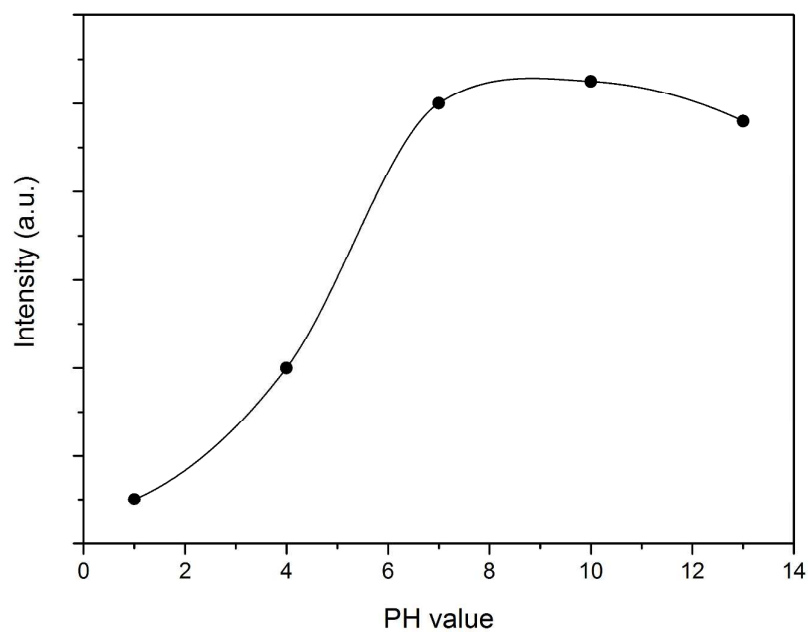

Figure S2. PL intensity of the RH-GQDs as a function of pH value.

### Quantum yield calculation

The photoluminescence quantum yield (QY) of the as-prepared RH-GQDs was calculated using Rhodamine B in water (literature quantum yield 0.31)<sup>1</sup> as the reference dye based on the following equation:<sup>2</sup>

$$\eta_s = \eta_{ref} \times \frac{I_s \times A_{ref} \times n_s^2}{I_{ref} \times A_s \times n_{ref}^2}$$

where  $I$ ,  $A$ , and  $n$  represent the integrated area of the PL emission, optical density at the excitation wavelength (400 nm), and refractive index of the solvent, respectively, for the sample ( $s$ ) and reference ( $ref$ ).

Table S1. Quantum yield of the RH-GQDs.

| Sample      | $I$       | $A$     | $n$  | $\eta$ |
|-------------|-----------|---------|------|--------|
| Rhodamine B | 372493527 | 0.2769  | 1.33 | 0.31   |
| RH-GQDs     | 36509484  | 0.09562 | 1.33 | 0.088  |

### References:

1. Magde, D.; Rojas Gail, E.; Seybold Paul, G., Solvent Dependence of the Fluorescence Lifetimes of Xanthene Dyes. *Photochemistry and Photobiology* **2008**, 70, (5), 737-744.
2. Shen, J.; Zhu, Y.; Chen, C.; Yang, X.; Li, C., Facile preparation and upconversion luminescence of graphene quantum dots. *Chemical communications* **2011**, 47, (9), 2580-2582.
